# Supplementary material
Source: Copernicus journal article supplement (doi:10.5194/egqsj-19-227-1968)
Supplement: Supplementary file 1 [file egqsj-19-227-1968-supplement.pdf]

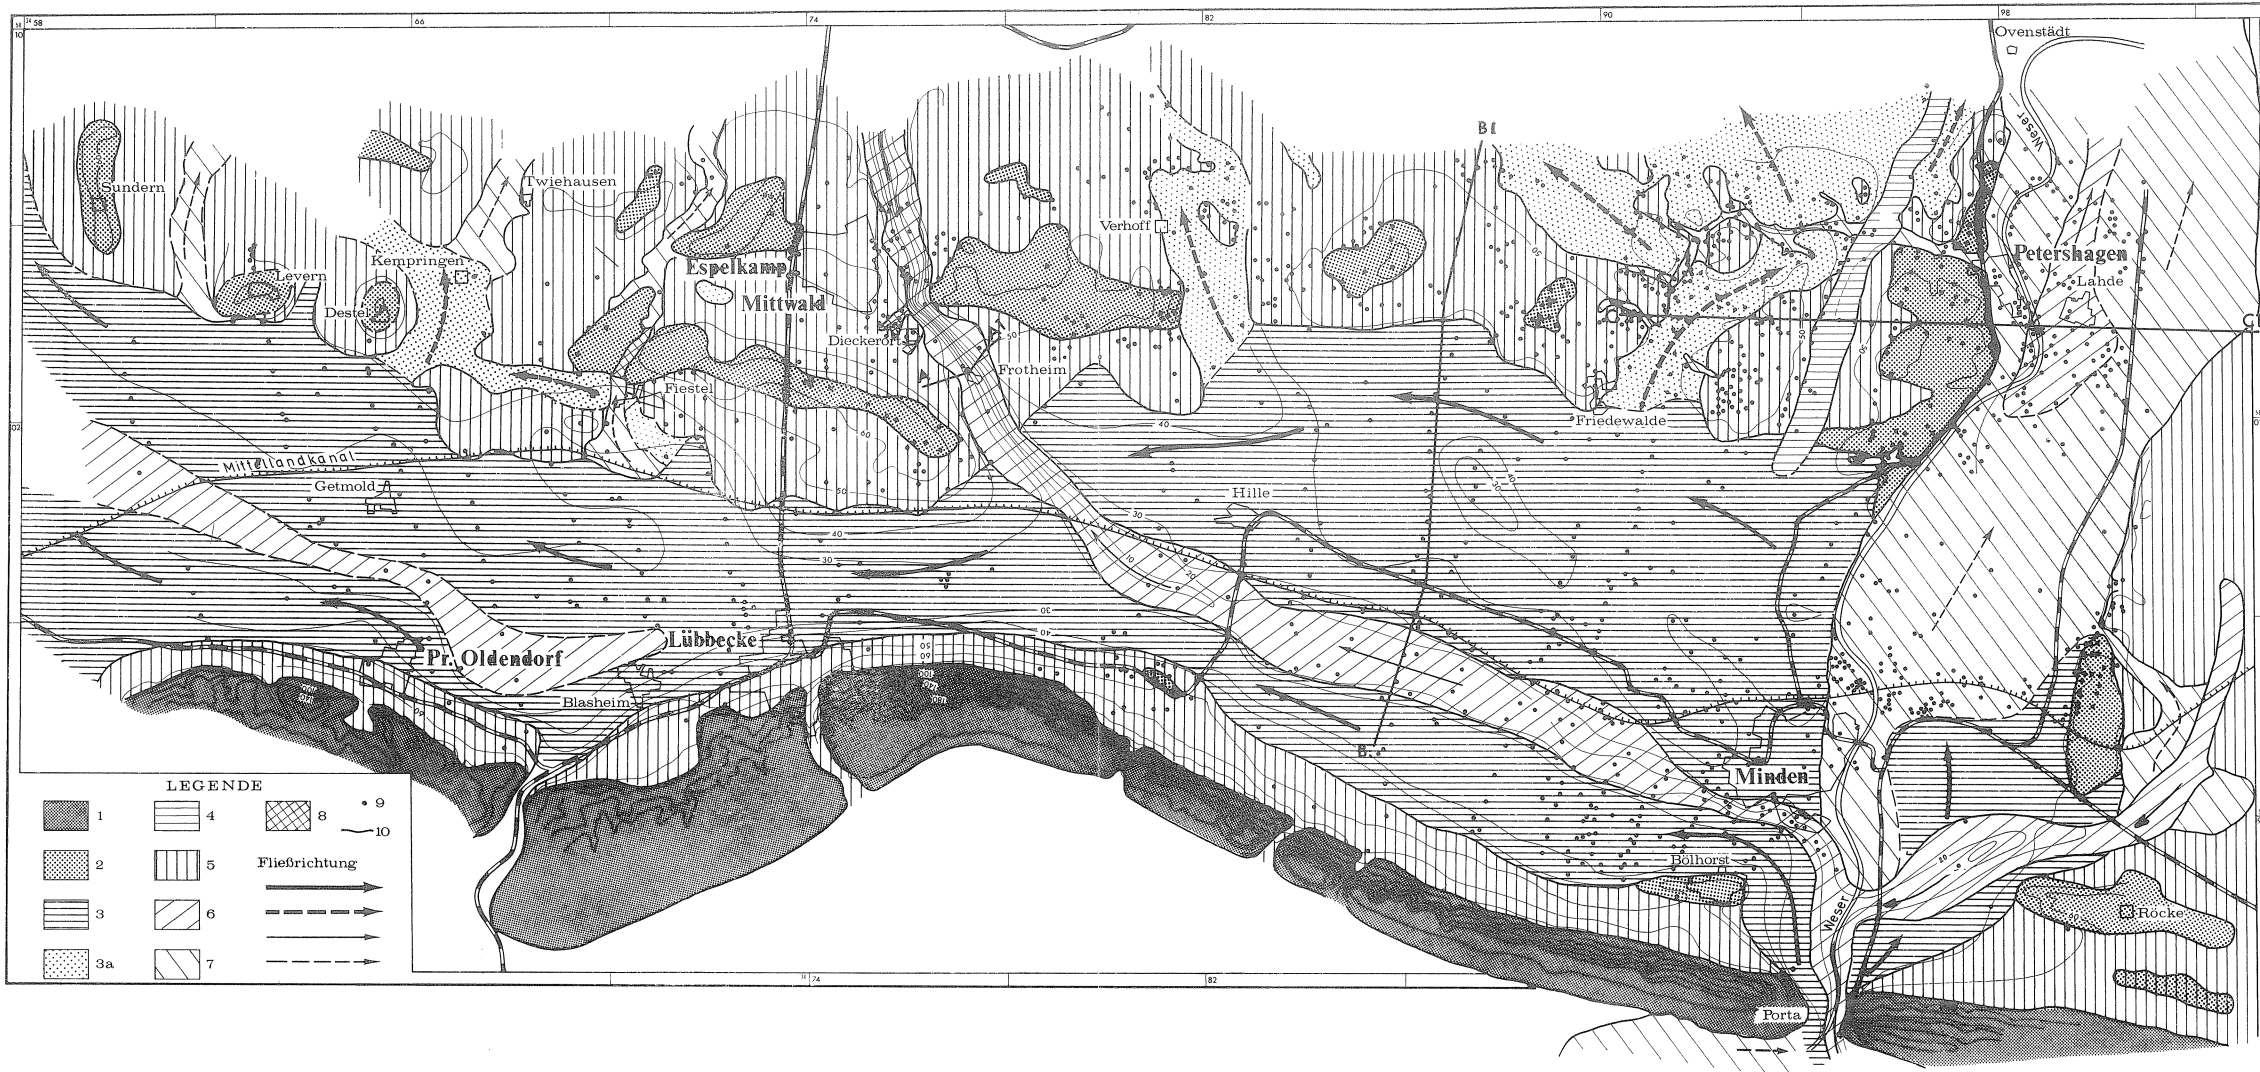

1 Weißjura Schichtkamm der Weserkette und des Wichengebirges; 2 Rumpfflächenreste mit C<sub>1</sub>-Horizonten einer tiefgründigen warmzeitlichen (tertiären?) Bodenbildung in mesozoischen Tonsteinen; 3 Fluviales Erosionsrelief aus der Zeit zwischen dem Hochstand der Elsterkaltzeit bis zur drenthestadialen Eisbedeckung; 3a Jüngster Teil von Einheit 3 (Seitenäste); 4 Glazifluviales Relief der Heisterholz-Rinne aus der Zeit der Eisbedeckung; 5 Exarationsrelief des Drenthe-Eises, zum kleinen Teil auch glazifluviales und (jüngeres) solifluidales Erosionsrelief; 6 Glazifluviales Rinnenrelief, ausgehend von Eisspaltensystemen beim Beginn des Drenthe-Eiszerfalls; 7 Fluviales Erosionsrelief aus der Zeit nach dem Drentheiszerfall; 8 Antezedente Talstrecken im Zusammenhang mit junger Salzttektonik; 9 Auswahl von Bohrpunkten; 10 Höhenlinien der Quartärbasis in m NN.  
Pfeile = Fließrichtungen  
A-A<sub>1</sub> bis C-C<sub>1</sub> Geologische Schnittlinien.
